# Supplementary material for: Bamboo-Activated Carbon Synthesized by One-Pot Pyrolysis and FeCl2 Activation for the Removal of Cr(VI) in Aqueous Solutions
Source: MDPI journal article supplement (doi:10.3390/w15101891), 2023-05-16
Supplement: s1 [file s1]

Archive with 1 entries (1 files):
- water-2347375-supplementary.pdf
