# Supplementary material for: Bamboo-Activated Carbon Synthesized by One-Pot Pyrolysis and FeCl2 Activation for the Removal of Cr(VI) in Aqueous Solutions
Source: MDPI journal article supplement (doi:10.3390/w15101891), 2023-05-16
Supplement: s1 [file s1 › water-2347375-supplementary.pdf]

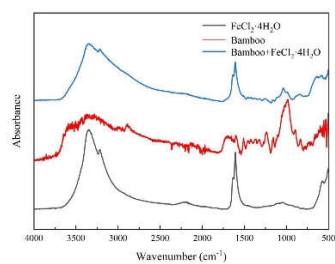

Figure S1 FTIR spectra of bamboo, FeCl<sub>2</sub>·4H<sub>2</sub>O, and the mixture of bamboo and FeCl<sub>2</sub>·4H<sub>2</sub>O

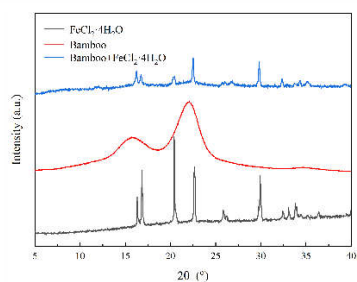

Figure S2 X-ray diffraction of bamboo, FeCl<sub>2</sub>·4H<sub>2</sub>O and the mixture of bamboo and FeCl<sub>2</sub>·4H<sub>2</sub>O
